# Supplementary material for: A Distinct Oncogenerative Multinucleated Cancer Cell Serves as a Source of Stemness and Tumor Heterogeneity
Source: Oxford University Press journal article supplement (doi:10.1158/0008-5472.can-17-1861), 2018-02-12
Supplement: 00085472can171861-sup-185194_2_supp_4549386_p39ndd.docx [file 00085472can171861-sup-185194_2_supp_4549386_p39ndd.docx]

**Supplemental Figure 1**: Occurrence and morphology of multinucleated cells in different tumors


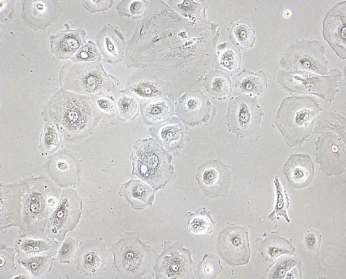


**MaCa 137**

25 µm


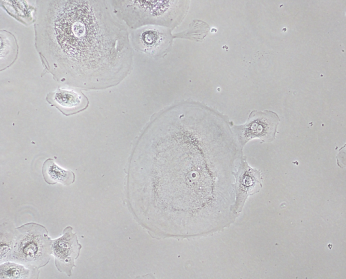


**MaCa 192**

50 µm


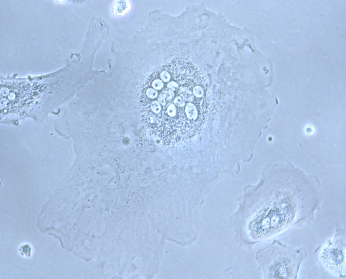


**MaCa 331**

50 µm


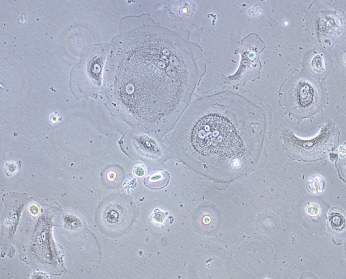


**OvCa246**

50 µm


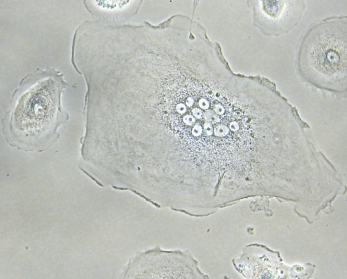


**OvCa331**

50 µm


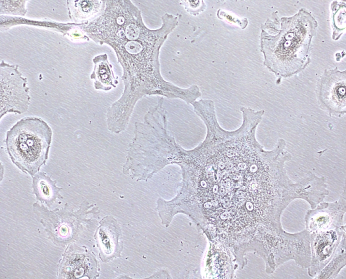


**OvCa239**

50 µm


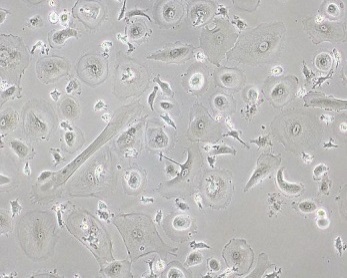


**PaCa 1**

25 µm


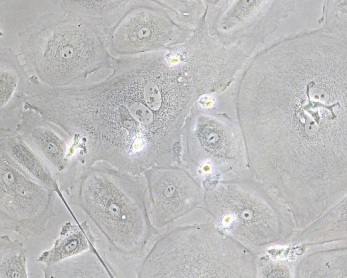


**PaCa 2**

50 µm


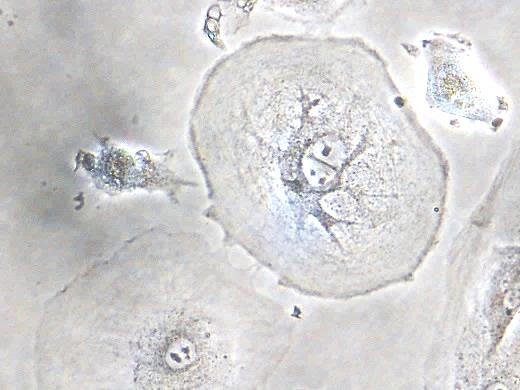


**PaCa 3**

50 µm


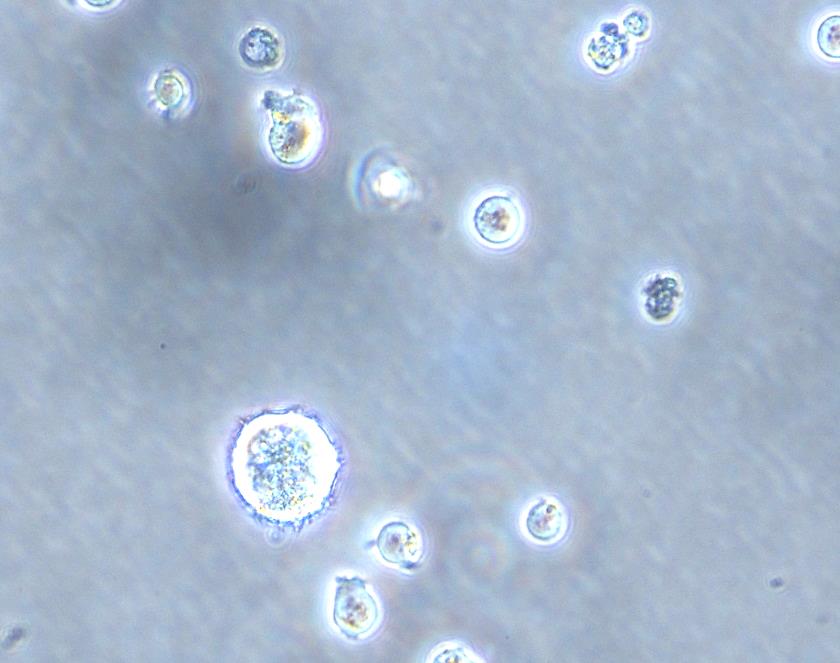


50 µm


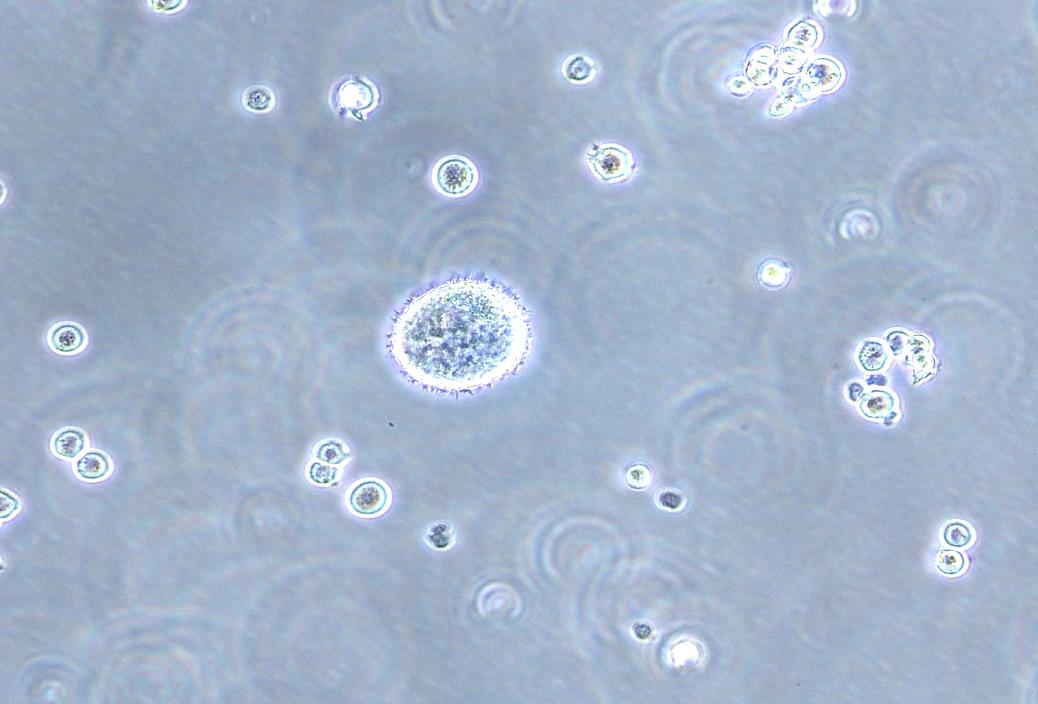


50 µm


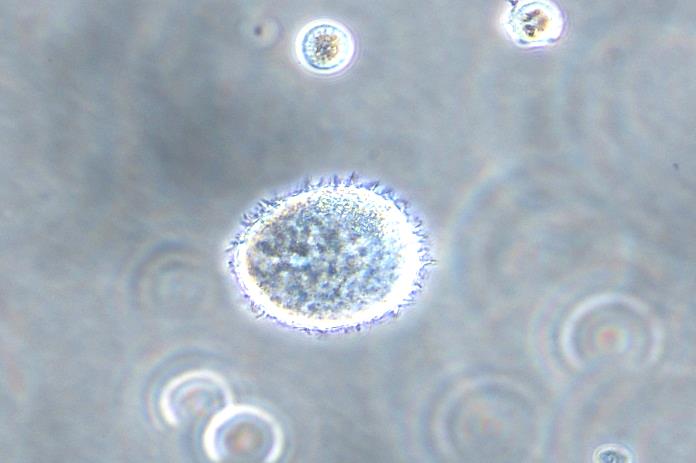


50 µm

**T-Cell Leukaemia**

**T-Cell Leukaemia**

**T-Cell Leukaemia**

**A**

**B**

**C**

**D**

**E**

**F**

**G**

**H**

**I**

**J**

**K**

**L**

**Panel A**: **Morphology of primary cell cultures from diverse tumors**. P1 and G1-Gn are present in several tumors. OvCa, ovarian carcinoma; MaCa, breast carcinoma; PaCa, pancreas carcinoma; T-cell leukemia (here Jurkat cell line).


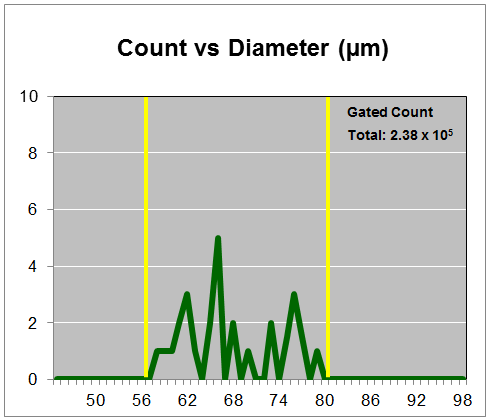

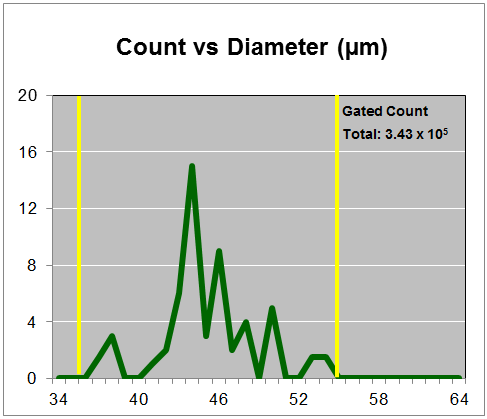

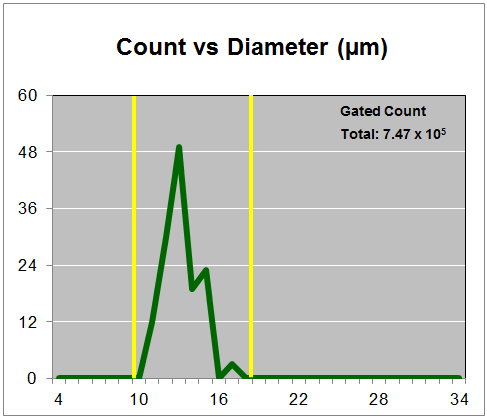


**M**

**N**

**O**

**Panel B:** **Presence of multinucleated cells in ovarian ascites cells**. Size distribution of cell population in ascites from ovarian carcinomas. **M**, cells isolated from untreated patients (Wildtype). **N** and **O**, cells from poly-chemotherapy experienced patients.
