# Supplementary material for: A Distinct Oncogenerative Multinucleated Cancer Cell Serves as a Source of Stemness and Tumor Heterogeneity
Source: Oxford University Press journal article supplement (doi:10.1158/0008-5472.can-17-1861), 2018-02-12
Supplement: 00085472can171861-sup-185194_2_supp_4549390_p3vndv.docx [file 00085472can171861-sup-185194_2_supp_4549390_p3vndv.docx]

**Supplemental Figure 5**: Expression of CSC markers and morphology of P1 oncogenerative and G1-Gn cells


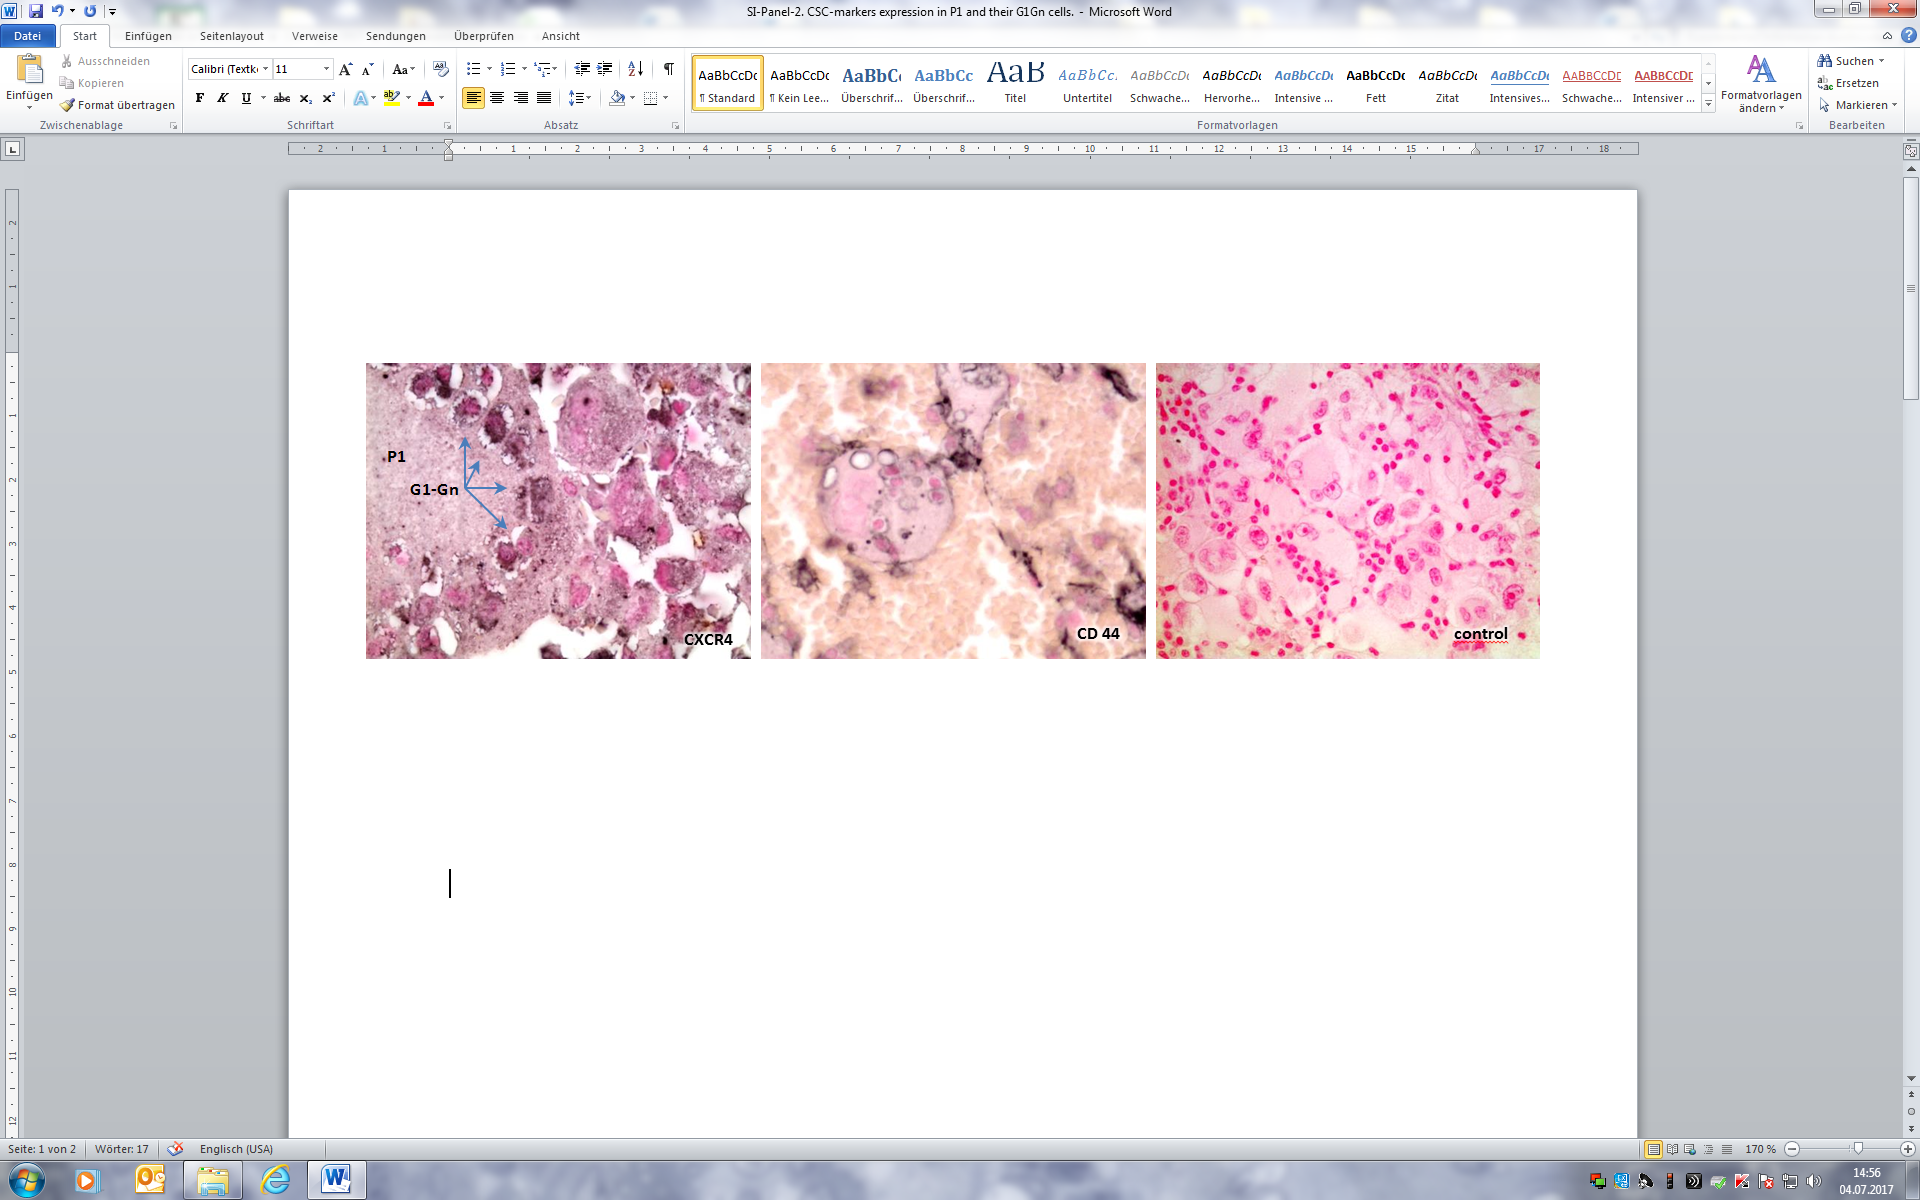


**A**

**G1-Gn**

**erythrocytes**

**aperture**

**P1**

**main nucleus**

**B**

**C**

**3**

,,


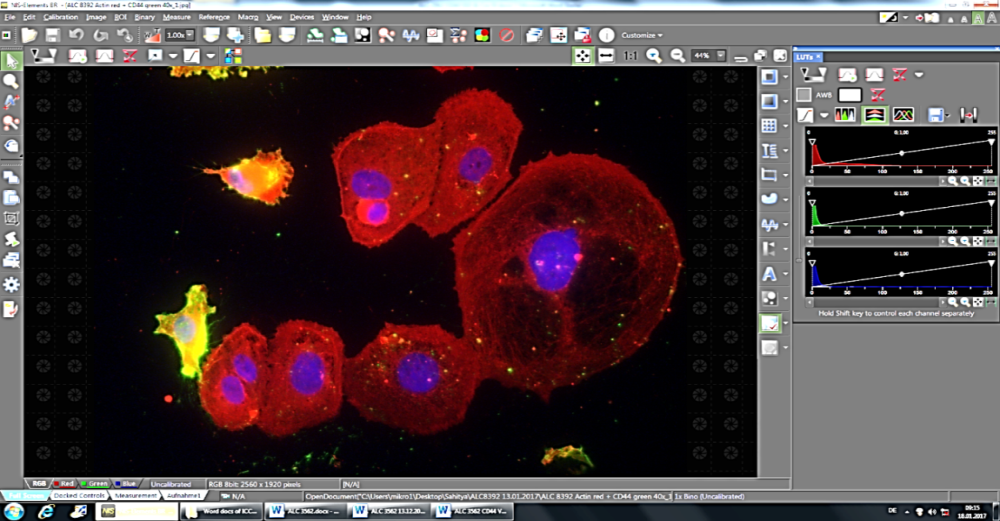


Merged

ESA/TROP 1

Actin

**G1-Gn**

**D**


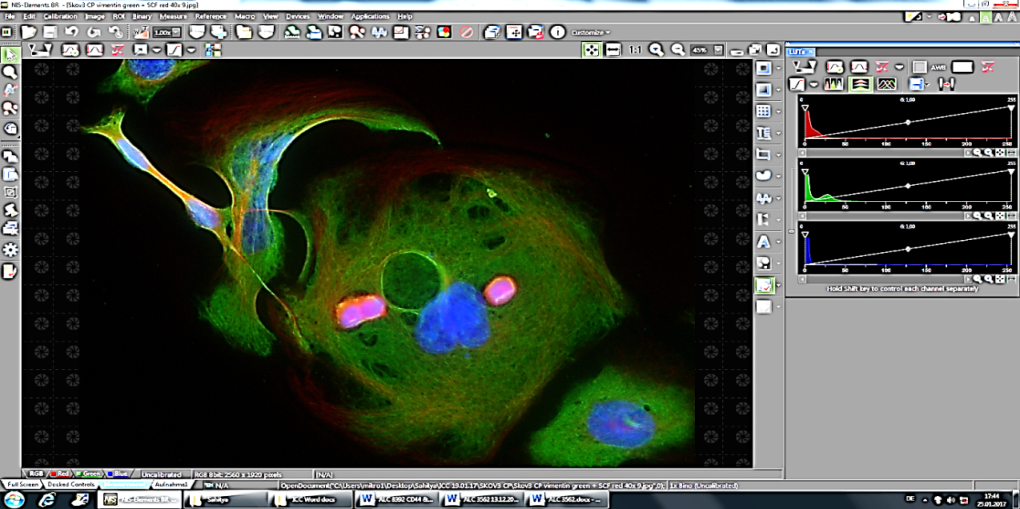


Merged

Vimentin

SCF

**G1-Gn**

**eclosion**

**E**

**Expression of CSC markers and key replicative effectors in ovarian primary cells and tumors. A:**  G1-Gn cells present inside P1 oncogenerative cells. They are CXCR4 (**A**) and CD44 (**B**) positive. CXCR4 is an alpha-chemokine receptor specific to stromal-derived-factor-1 (SDF-1 also called CXCL12). This chemokine plays an important role in cell survival, proliferation, migration and metastasis formation in several cancers. **A** shows crevices in P1 and eclosion of G1-Gn cells. **B** gives an idea of the size of P1 oncogenerative cells in relation to erythrocytes. **C**: control. DAB staining. **D**: expression of ESA/TROP1. **E**: expression of SCF, a cytokine that binds to the c-KIT receptor (which is also overexpressed in P1 and G1-Gn cells). SCF plays an important role during embryonic development.
