# Supplementary material for: A Distinct Oncogenerative Multinucleated Cancer Cell Serves as a Source of Stemness and Tumor Heterogeneity
Source: Oxford University Press journal article supplement (doi:10.1158/0008-5472.can-17-1861), 2018-02-12
Supplement: 00085472can171861-sup-185194_2_supp_4549391_p34nd4.docx [file 00085472can171861-sup-185194_2_supp_4549391_p34nd4.docx]

**Supplemental Figure 6**: Resistance profile and spherogenicity of SKOV3 ovarian carcinoma models


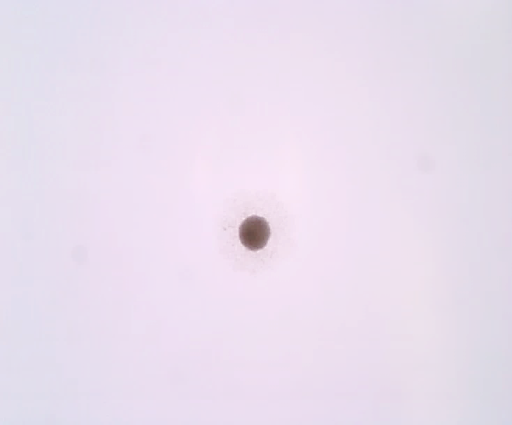


**WT**

**C**


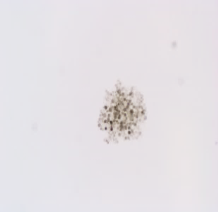


**CP**

**E**


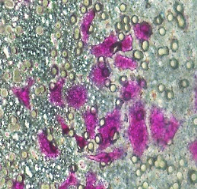


**Up**

**F**


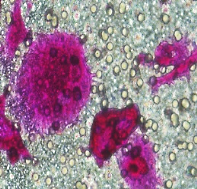


**Up**

**G**


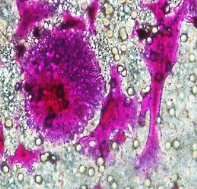


**Up**

**H**


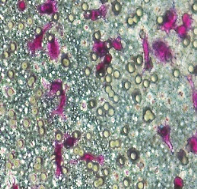


**Down**

**I**


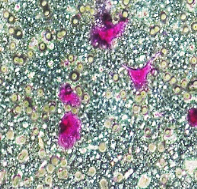


**Down**

**J**


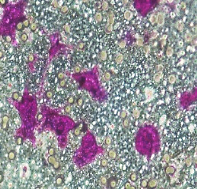


**Down**

**K**


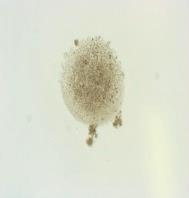


**MDR1+**

**D**


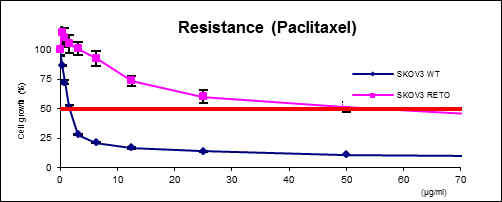

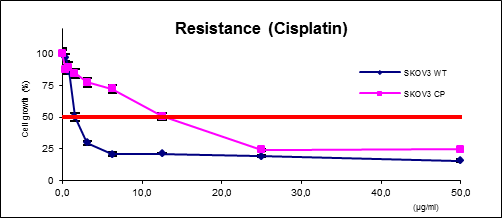


**A**

**B**

**Morphology of SKOV3 ovarian carcinoma cells in 3D cultures and their migration patterns**. Resistance status of SKOV3 cells against paclitaxel and cisplatin can be visualised from **A** and **B** respectively. Morphologic pictures of hanging drop 3D cultures (**C**-**E**) in wildtype and resistant SKOV3 ovarian carcinoma cells. Chemotherapy refractory MDR1+ (cross-resistant to etoposide, doxorubicin, vinblastine and paclitaxel) and carboplatin cells are not able to form spheres in 3D hanging drops cultures (**D** &**E**). Wildtype cells effectively build spheres when cultured in hanging drops (**C**). The frequency to localize multinucleated cells in chemotherapy refractory cells (**G** & **H**) is higher in resistant models in comparison to the wiltype parental (**F**). The ability to migrate in a Transwell 8 µm pore system is higher for the small cells (down, **I**-**K**) than the multinucleated cells (**G** & **H**). Visualization was conducted by Sulforhodamine B staining. Experiment repetitions n>3.
