# Supplementary material for: A Distinct Oncogenerative Multinucleated Cancer Cell Serves as a Source of Stemness and Tumor Heterogeneity
Source: Oxford University Press journal article supplement (doi:10.1158/0008-5472.can-17-1861), 2018-02-12
Supplement: 00085472can171861-sup-185194_2_supp_4549392_p35nd5.docx [file 00085472can171861-sup-185194_2_supp_4549392_p35nd5.docx]

**Supplemental Figure 7:** Expression of CSC markers in multinucleated cells at protein and RNA levels


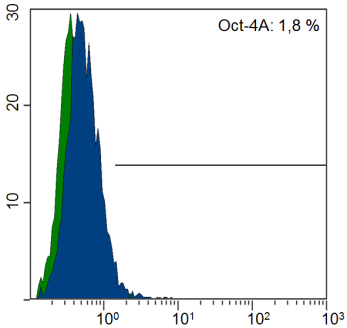

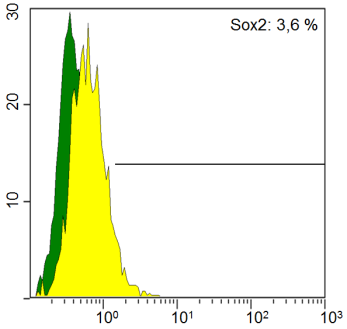

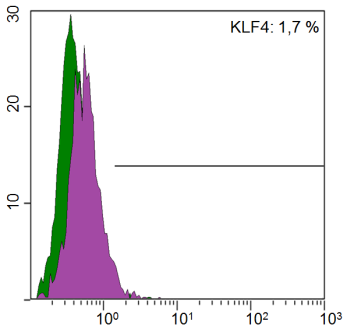

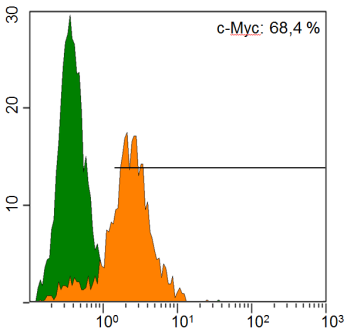


**A**

**B**

**C**

**D**

**Panel A: Expression of Yamanaka stem cell transcription factors.** Expression of Oct4A, Sox2, KLF4 is around 2% at the protein level as assayed by FACS. The abundance of c-Myc in several tumors is widely known, which is substantiated by our observations.


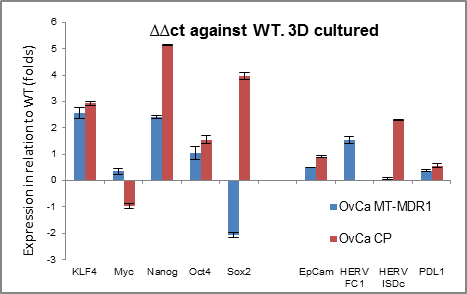

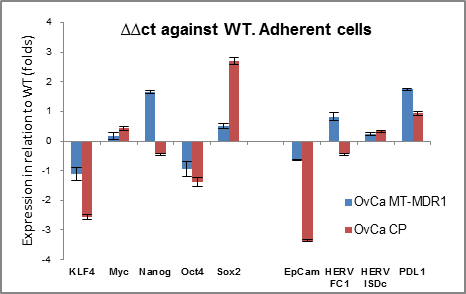


**E**

**F**

**Panel B: Expression of stem cell transcription factors, CSC-related markers, HERVK-ISD and the immune checkpoint PDL-1 in SKOV3 wildtype and chemotherapy resistant cells as measured by qPCR. E**:Relative gene expression in adherent cells**.** In Carboplatin resistant cells c-Myc, Nanog and Sox2 stem cell transcriptions factors are up regulated. In MDR1+ cells, Nanog was down-regulated. EpCAM CSC marker was down-regulated in both resistant cells. Both, the ISD of HERV-K and the immuno checkpoint PDL-1 were upregulated in resistant cells. **F**: Relative gene expression in 3D cultured cells. Both MDR+ and CP resistant cells depict a different gene expression for which KLF4, Nanog, Oct4 are overexpressed. c-Myc was down-regulated and Sox2 was upregulated in CP cells. EpCAM was up-regulated in opposition to adherent cells and both, the ISD of HERV-K and the immuno checkpoint PDL-1 were upregulated in resistant cells as seen in adherent cells.
